# Supplementary material for: Glyteer, Soybean Tar, Impairs IL-4/Stat6 Signaling in Murine Bone Marrow-Derived Dendritic Cells: The Basis of Its Therapeutic Effect on Atopic Dermatitis
Source: PubMed Central journal article supplement (PMC5979322; doi:10.3390/ijms19041169), 2018-04-12
Supplement: ijms-19-01169-s001.pdf [file ijms-19-01169-s001.pdf]

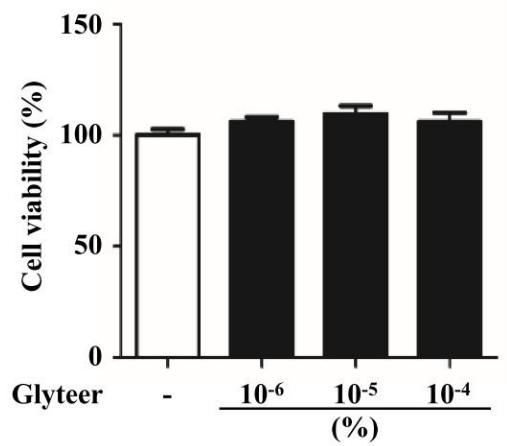

Figure S1 Cell viability of Glyteer-treated BMDCs. Data are expressed as mean  $\pm$  S.E.M.;  $n = 3$  for each group; \*  $p < 0.05$ . BMDCs were treated with Glyteer at the indicated concentration. Cell viability was evaluated by WST-1 assay. The relative cell viability (%) compared with DMSO (control)-treated BMDCs was calculated.
